# Supplementary material for: Genome editing enables reverse genetics of multicellular development in the choanoflagellate Salpingoeca rosetta
Source: eLife journal article supplement (doi:10.7554/elife.56193), 2020-06-04
Supplement: supp [file elife-56193-supp-v1.zip]

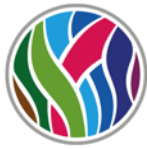

## eLife's transparent reporting form

We encourage authors to provide detailed information *within their submission* to facilitate the interpretation and replication of experiments. Authors can upload supporting documentation to indicate the use of appropriate reporting guidelines for health-related research (see [EQUATOR Network](#)), life science research (see the [BioSharing Information Resource](#)), or the [ARRIVE guidelines](#) for reporting work involving animal research. Where applicable, authors should refer to any relevant reporting standards documents in this form.

If you have any questions, please consult our Journal Policies and/or contact us: [editorial@elifesciences.org](mailto:editorial@elifesciences.org).

### Sample-size estimation

- You should state whether an appropriate sample size was computed when the study was being designed
- You should state the statistical method of sample size computation and any required assumptions
- If no explicit power analysis was used, you should describe how you decided what sample (replicate) size (number) to use

Please outline where this information can be found within the submission (e.g., sections or figure legends), or explain why this information doesn't apply to your submission:

Editing Optimization (Figure 2-figure supplement 2): Duplicate experiments were performed across all titration curves to establish consistency. We chose not to perform statistical analyses of these results, as duplicates don't provide a fair estimate of variance. Hence, we plot all of the data individually for readers to critically evaluate.

Growth Characterization (Figures 2 and Figure 3-figure supplement 2): The initial concentration of 10k cells/ml represents ~1 cell/square in a haemocytometer or ~5 cells in a viewing field with a calibrated area. We chose this as the minimum starting point to monitor growth over 2-3 orders of magnitude, as it is the lowest concentration to accurately measure. Three replicates were performed to extract the mean and variance of growth parameters, but no formal power analysis was used to determine that number of replicates.

Deep Sequencing (Figure 4 and Supplement): For each transfection experiment, ~400k cells were initially used, of which ~50% die, thus the upper limit for valid sequences in each experiment is on the order of 100k. To minimize the possibility of analyzing duplicate sequences, we used a 6-base randomized sequence to confidently analyze ~4k sequences, or 1% of the transfected cells. This also provided a base line of sensitivity of 0.02% for the detection of genome edits. All editing experiments were performed in triplicate to analyze variance.

### Replicates

- You should report how often each experiment was performed
- You should include a definition of biological versus technical replication
- The data obtained should be provided and sufficient information should be provided to indicate the number of independent biological and/or technical replicates
- If you encountered any outliers, you should describe how these were handled
- Criteria for exclusion/inclusion of data should be clearly stated
- High-throughput sequence data should be uploaded before submission, with a private link for reviewers provided (these are available from both GEO and ArrayExpress)

Please outline where this information can be found within the submission (e.g., sections or figure legends), or explain why this information doesn't apply to your submission:

Information on replicates can be found in the Materials and Methods and Figure Legends as well as commentary in the main text of the results.

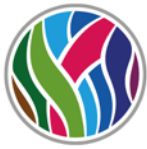

### Statistical reporting

- Statistical analysis methods should be described and justified
- Raw data should be presented in figures whenever informative to do so (typically when N per group is less than 10)
- For each experiment, you should identify the statistical tests used, exact values of N, definitions of center, methods of multiple test correction, and dispersion and precision measures (e.g., mean, median, SD, SEM, confidence intervals; and, for the major substantive results, a measure of effect size (e.g., Pearson's r, Cohen's d)
- Report exact p-values wherever possible alongside the summary statistics and 95% confidence intervals. These should be reported for all key questions and not only when the p-value is less than 0.05.

Please outline where this information can be found within the submission (e.g., sections or figure legends), or explain why this information doesn't apply to your submission:

(For large datasets, or papers with a very large number of statistical tests, you may upload a single table file with tests, Ns, etc., with reference to sections in the manuscript.)

### Group allocation

- Indicate how samples were allocated into experimental groups (in the case of clinical studies, please specify allocation to treatment method); if randomization was used, please also state if restricted randomization was applied
- Indicate if masking was used during group allocation, data collection and/or data analysis

Please outline where this information can be found within the submission (e.g., sections or figure legends), or explain why this information doesn't apply to your submission:

### Additional data files ("source data")

- We encourage you to upload relevant additional data files, such as numerical data that are represented as a graph in a figure, or as a summary table
- Where provided, these should be in the most useful format, and they can be uploaded as "Source data" files linked to a main figure or table
- Include model definition files including the full list of parameters used
- Include code used for data analysis (e.g., R, MatLab)
- Avoid stating that data files are "available upon request"

Please indicate the figures or tables for which source data files have been provided:
